# Supplementary material for: Selective and non-selective modification of electrodes in organic thin film transistors by self-assembled monolayers
Source: Royal Society of Chemistry journal article supplement (doi:10.1039/d3tc00798g), 2023-01-01
Supplement: d3tc00798g1.pdf [file d3tc00798g1.pdf]

## Electronic Supplementary Information

### Selective and non-selective modification of electrodes in organic thin film transistors by self-assembling monolayers

Meng-Tieh Liu<sup>1</sup>, Cheng-Yu Chi<sup>1,3</sup>, Michael Zharnikov\*<sup>2</sup>, and Yian Tai\*<sup>1,3</sup>

*<sup>1</sup>Department of Chemical Engineering, National Taiwan University of Science and Technology, 10607 Taipei, Taiwan.*

*<sup>2</sup>Applied Physical Chemistry, Ruprecht-Karls-Universität Heidelberg, 69120 Heidelberg, Germany.*

*<sup>3</sup>Taiwan Building Technology Center, National Taiwan University of Science and Technology, Taipei 10607, Taiwan*

**\*Corresponding Authors:** Yian Tai; Michael Zharnikov

**Emails:** ytai@mail.ntust.edu.tw; michael.zharnikov@pci.uni-heidelberg.de

**Table S1.** Parameters of the peaks in the XRD curves for the P3HT/ITO and P3HT/SAM/ITO samples (Figure 5) as well as the derived grain size of P3HT. The relevant SAMs are termed either directly or by the portions of CF<sub>3</sub>-BA in the primary CF<sub>3</sub>-BA/OCH<sub>3</sub>-BA solutions.

| Sample               | Peak position (°) | FWHM  | Grain size (Å) | Intensity |
|----------------------|-------------------|-------|----------------|-----------|
| Pristine (ITO)       | 5.405             | 0.500 | 159.5          | 50        |
| OCH <sub>3</sub> -BA | 5.261             | 0.510 | 156.4          | 48        |
| 20%                  | 5.287             | 0.500 | 159.5          | 38        |
| 40%                  | 5.261             | 0.464 | 170.7          | 37        |
| 60%                  | 5.287             | 0.550 | 145.0          | 46        |
| 80%                  | 5.339             | 0.520 | 153.4          | 43        |
| CF <sub>3</sub> -BA  | 5.287             | 0.520 | 153.4          | 45        |

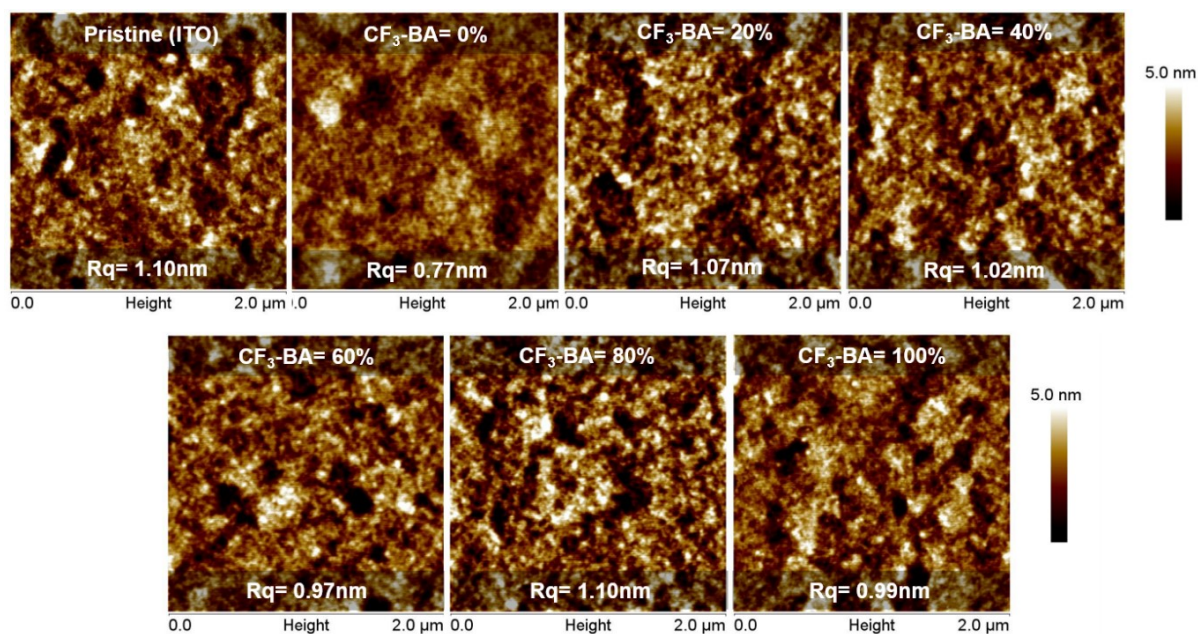

**Figure S1.** AFM images of the P3HT/ITO and P3HT/SAM/ITO samples. The relevant SAMs are termed by the portions of CF<sub>3</sub>-BA in the primary CF<sub>3</sub>-BA/OCH<sub>3</sub>-BA solutions. Surface roughness ( $R_q$ ) derived from these images is marked.

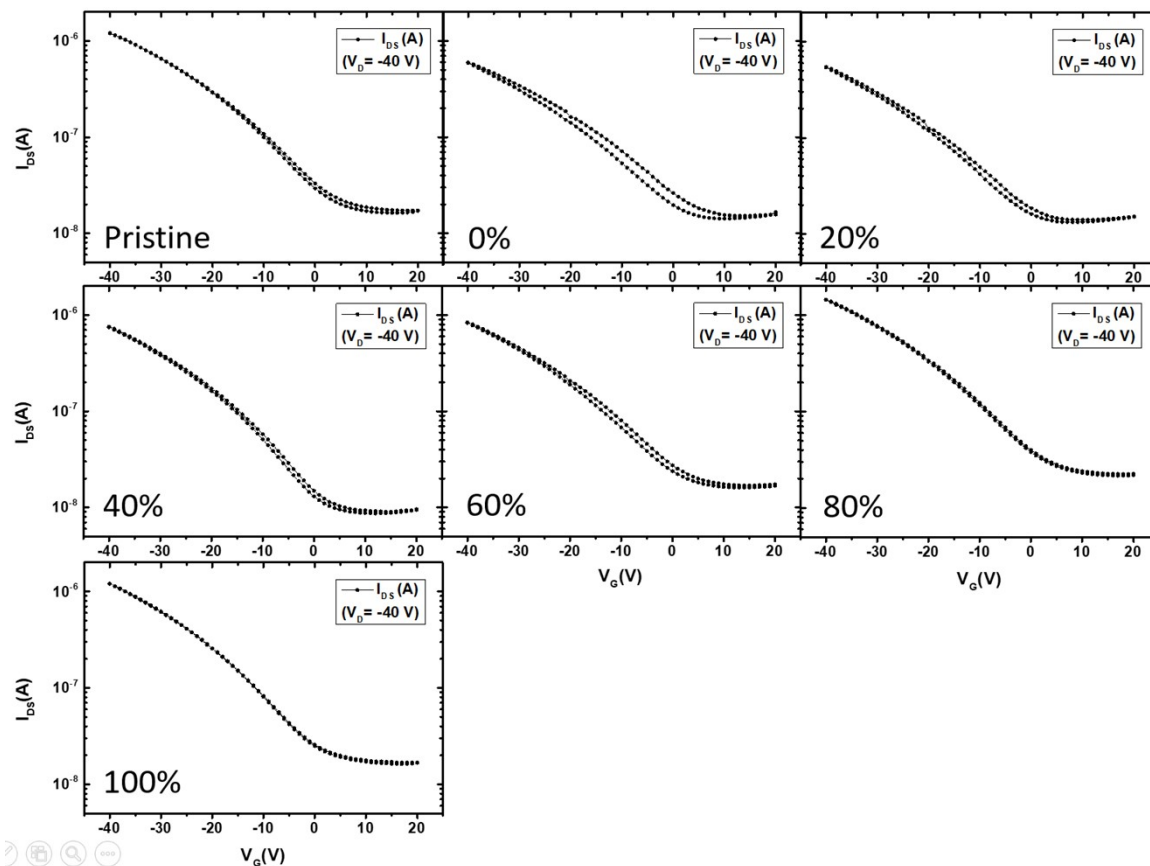

**Figure S2.** Typical transfer characteristics ( $I_{DS}$  vs  $V_G$ ) of the OTFTs with untreated (pristine) and SAM-engineered ITO electrodes.  $I_{DS}$  is current between source and drain,  $V_D$  – potential difference between these electrodes, and  $V_G$  – gate voltage. The relevant SAMs are termed by the portions of  $CF_3$ -BA in the primary  $CF_3$ -BA/ $OCH_3$ -BA solutions.

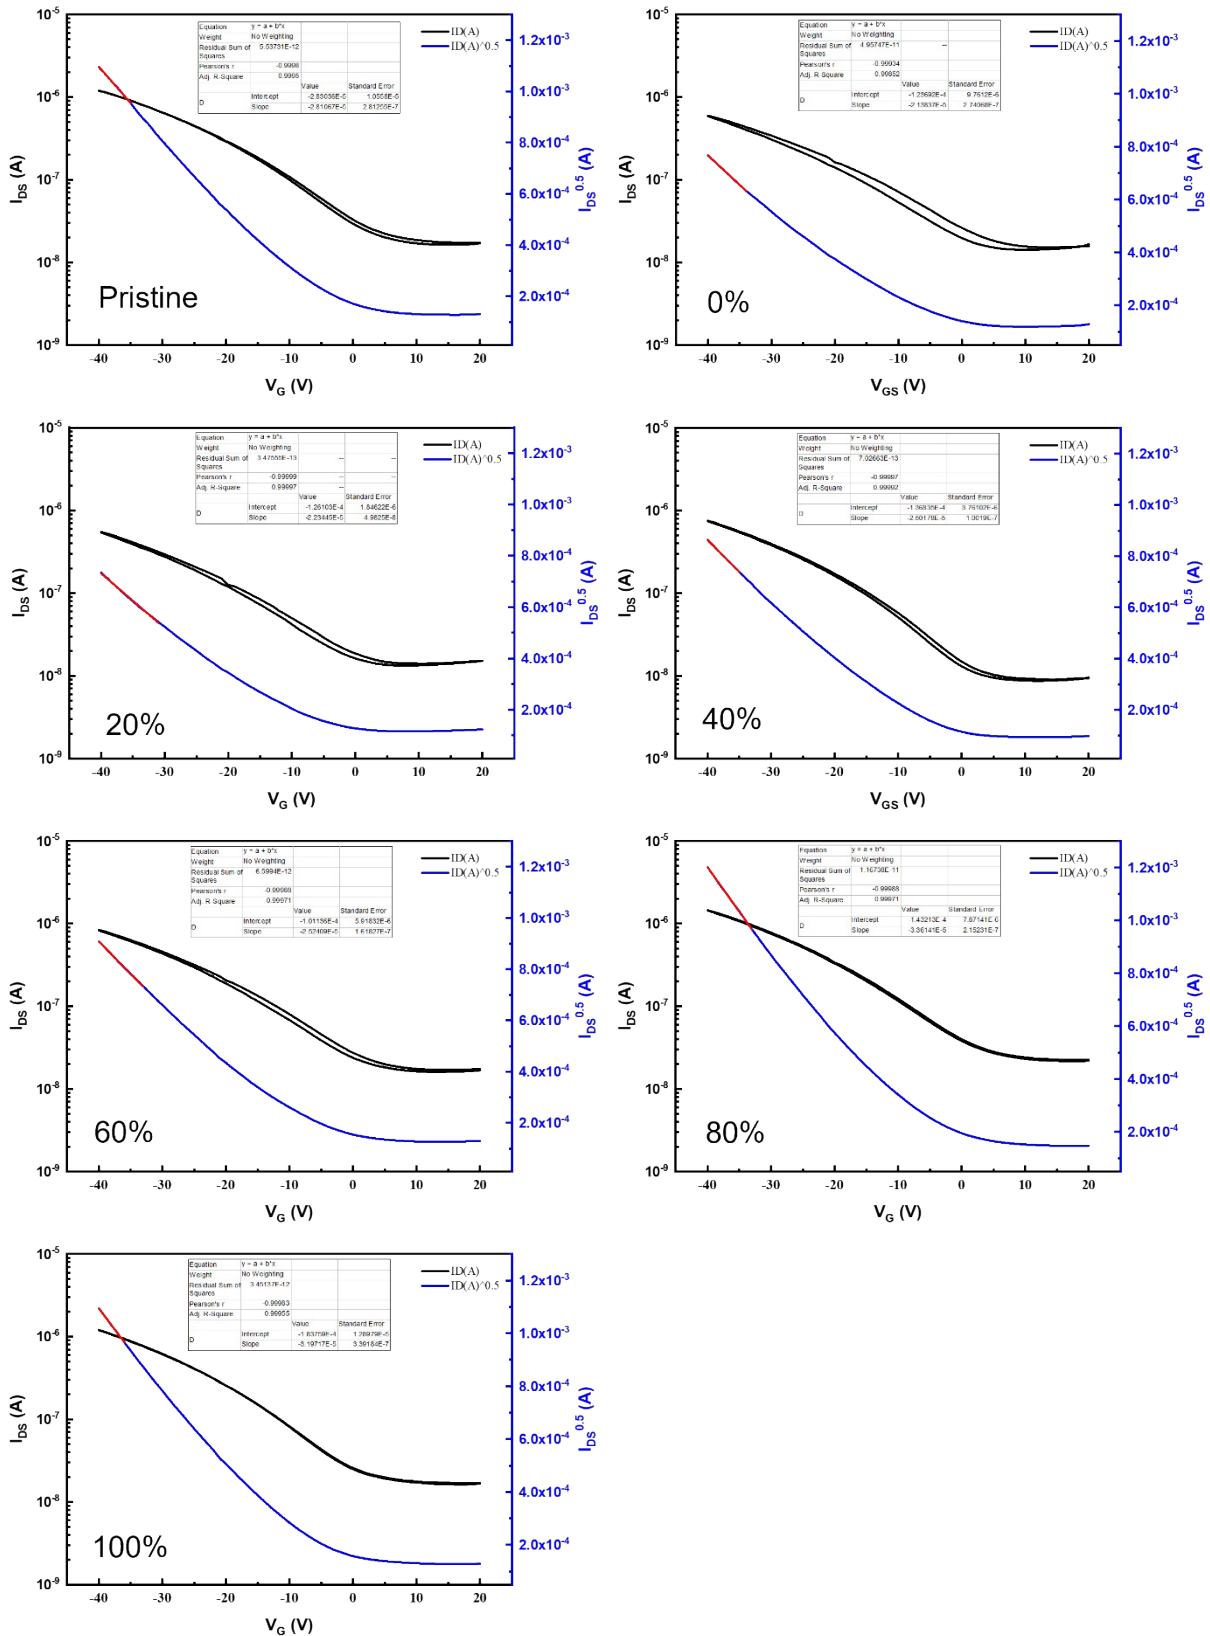

**Figure S3.** The fitting of the linearity of the square-root drain current versus gate voltage curves ( $I_{DS}^{0.5}$  vs  $V_G$ ) of the OTFT with untreated (pristine) and BA-SAM-engineered ITO electrodes. The fitting position in each curve is marked in red. The relevant SAMs are termed by the portions of  $CF_3$ -BA in the primary  $CF_3$ -BA/ $OCH_3$ -BA solutions.

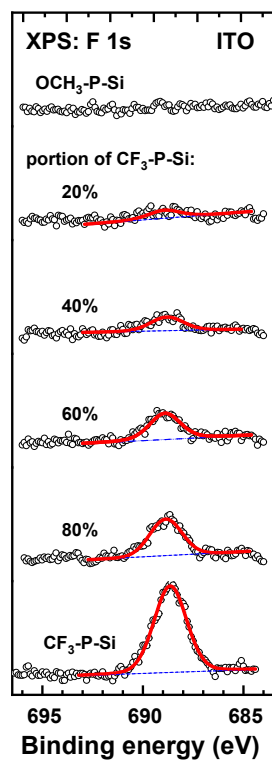

**Figure S4.** F 1s XP spectra of OCH<sub>3</sub>-P-Si/CF<sub>3</sub>-P-Si SAMs on ITO. The spectra are fitted by a single peak (red solid lines). The SAM-engineered surfaces are termed either directly or by the portion of CF<sub>3</sub>-BA in the primary solutions.

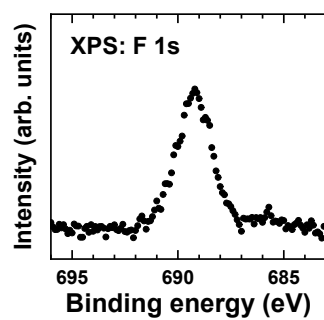

**Figure S5.** F 1s XP spectrum of CF<sub>3</sub>-P-Si SAM on glass.

**Table S2.** Parameters of the peaks in the XRD curves for the P3HT/ITO and P3HT/SAM/ITO samples (Figure 10a) as well as the derived grain size of P3HT. The relevant SAMs are termed either directly or by the portions of CF<sub>3</sub>-P-Si in the primary CF<sub>3</sub>-P-Si/OCH<sub>3</sub>-P-Si solutions.

| Sample                      | Peak position (°) | F.W.H.M. | Grain size (Å) | Intensity |
|-----------------------------|-------------------|----------|----------------|-----------|
| <b>Pristine (ITO)</b>       | 5.713             | 0.593    | 134.5          | 174       |
| <b>OCH<sub>3</sub>-P Si</b> | 5.560             | 0.590    | 135.2          | 261       |
| <b>20%</b>                  | 5.630             | 0.603    | 132.3          | 202       |
| <b>40%</b>                  | 5.615             | 0.512    | 155.8          | 145       |
| <b>60%</b>                  | 5.670             | 0.516    | 154.6          | 118       |
| <b>80%</b>                  | 5.604             | 0.510    | 156.4          | 161       |
| <b>CF<sub>3</sub>-P Si</b>  | 5.633             | 0.506    | 157.6          | 219       |

**Table S3.** Parameters of the peaks in the XRD curves for the P3HT/glass and P3HT/SAM/glass samples (Figure 10b) as well as the derived grain size of P3HT. The relevant SAMs are termed either directly or by the portions of CF<sub>3</sub>-P-Si in the primary CF<sub>3</sub>-P-Si/OCH<sub>3</sub>-P-Si solutions.

| Sample                      | Peak position (°) | F.W.H.M. | Grain size (Å) | Intensity |
|-----------------------------|-------------------|----------|----------------|-----------|
| <b>Pristine (glass)</b>     | 5.620             | 0.626    | 127.4          | 50        |
| <b>OCH<sub>3</sub>-P Si</b> | 5.634             | 0.566    | 140.9          | 172       |
| <b>20%</b>                  | 5.560             | 0.633    | 126.0          | 160       |
| <b>40%</b>                  | 5.676             | 0.580    | 137.5          | 180       |
| <b>60%</b>                  | 5.641             | 0.510    | 156.4          | 125       |
| <b>80%</b>                  | 5.667             | 0.486    | 164.1          | 69        |
| <b>CF<sub>3</sub>-P Si</b>  | 5.579             | 0.500    | 159.5          | 216       |

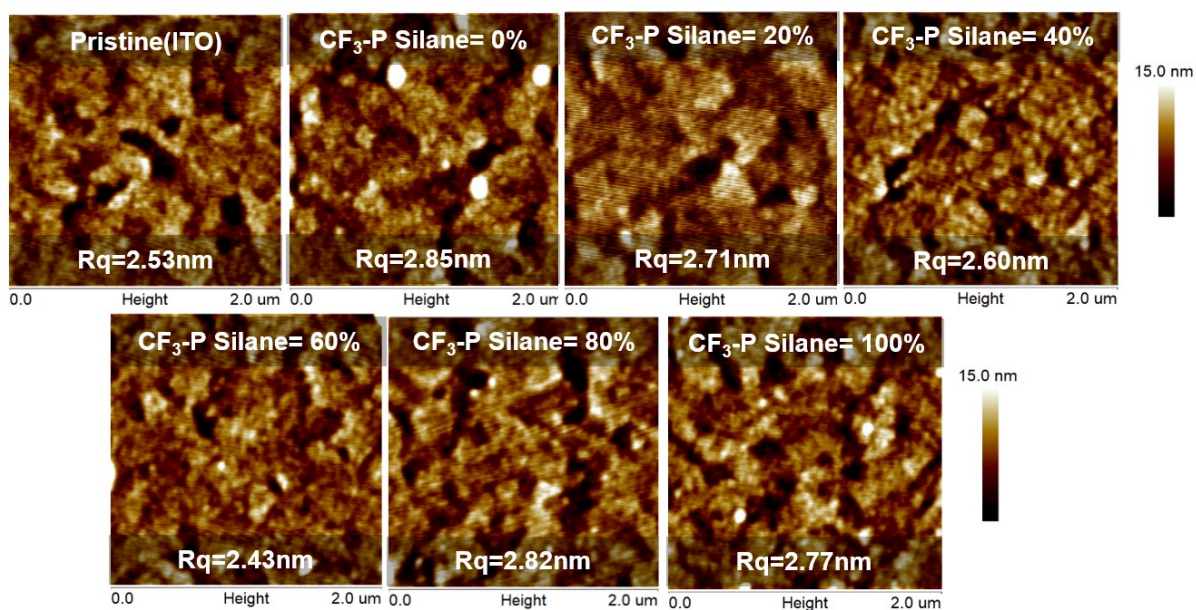

**Figure S6.** AFM images of the P3HT/ITO and P3HT/SAM/ITO samples. The relevant SAMs are termed by the portions of  $\text{CF}_3\text{-P-Si}$  in the primary  $\text{CF}_3\text{-P-Si/OCH}_3\text{-P-Si}$  solutions. Surface roughness ( $R_q$ ) derived from these images is marked.

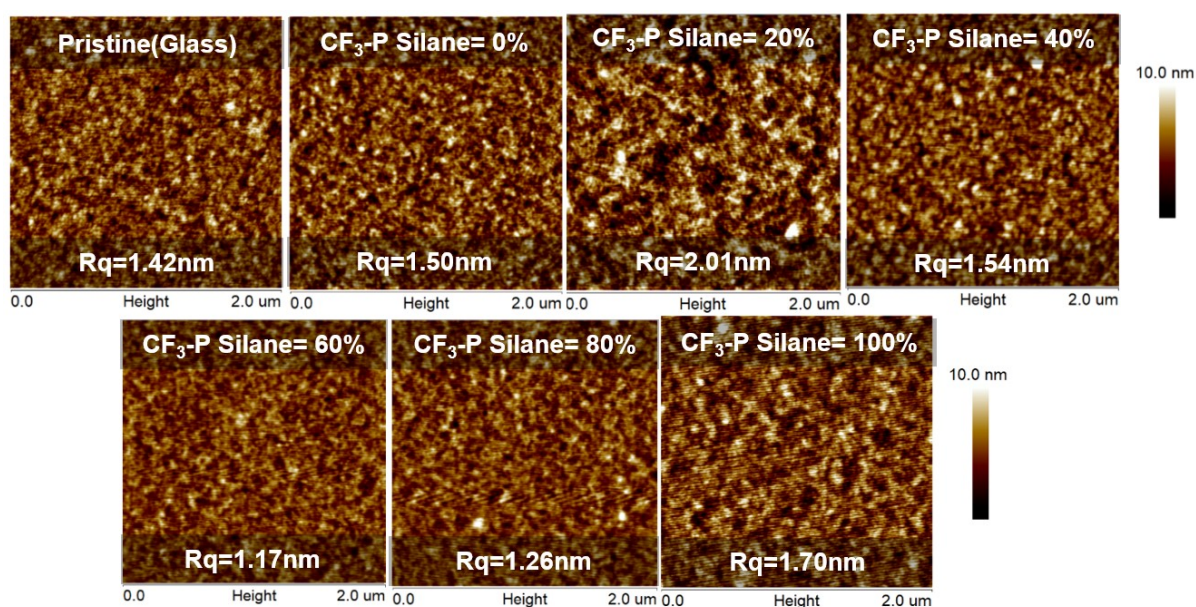

**Figure S7.** AFM images of the P3HT/glass and P3HT/SAM/glass samples. The relevant SAMs are termed by the portions of  $\text{CF}_3\text{-BA}$  in the primary  $\text{CF}_3\text{-BA/OCH}_3\text{-BA}$  solutions. Surface roughness ( $R_q$ ) derived from these images is marked.

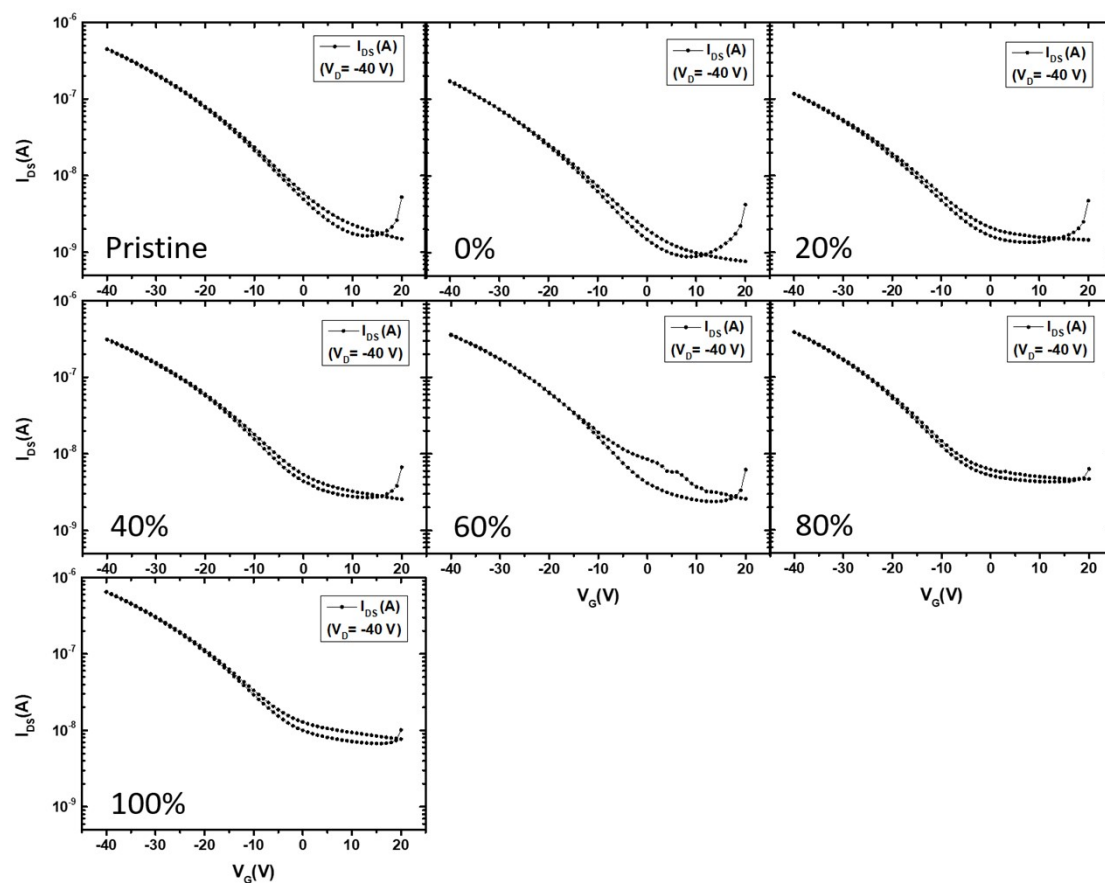

**Figure S8.** Typical transfer characteristics ( $I_{DS}$  vs  $V_G$ ) of the OTFTs with untreated (pristine) and SAM-engineered ITO electrodes and glass substrate.  $I_{DS}$  is current between source and drain,  $V_D$  – potential difference between these electrodes, and  $V_G$  – gate voltage. The relevant SAMs are termed by the portions of  $CF_3$ -P-Si in the primary  $CF_3$ -P-Si/ $OCH_3$ -P-Si solutions.
